# Supplementary material
Source: PubMed Central journal article supplement (PMC7902464)
Supplement: NIHMS1657215-supplement-Supplemental_Material.pdf [file NIHMS1657215-supplement-Supplemental_Material.pdf]

## **SUPPLEMENTAL MATERIAL**

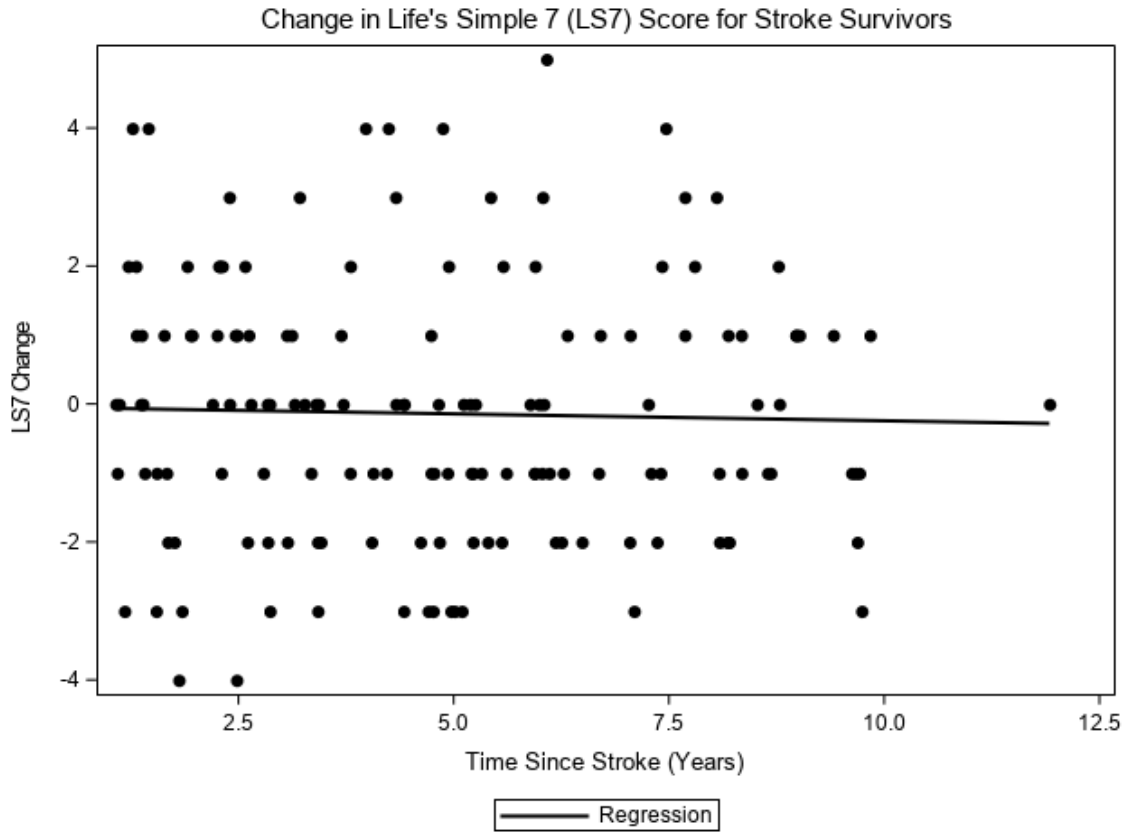

Supplemental Figure I

**Supplemental Table I.** Baseline and follow-up values for total cholesterol, systolic blood pressure (SBP), diastolic blood pressure (DBP) and glucose by stroke status

|                           | Stroke   |           | No stroke |           |
|---------------------------|----------|-----------|-----------|-----------|
|                           | Baseline | Follow-up | Baseline  | Follow-up |
| Total cholesterol (mg/dL) | 190.65   | 163.45    | 193.28    | 180.75    |
| SBP (mmHg)                | 131.37   | 127.01    | 125.61    | 124.29    |
| DBP (mmHg)                | 77.78    | 72.97     | 76.39     | 73.37     |
| Glucose (mg/dL)           | 110.56   | 110.46    | 101.18    | 102.95    |
